# Supplementary material for: p21Waf1 deficiency does not decrease DNA repair in E1A+cHa-Ras transformed cells by HDI sodium butyrate
Source: publisher site journal article supplement (doi:10.1515/hsz-2018-0249), 2018-07-24
Supplement: Supplementary file 1 [file hsz-2018-0249_suppl.pdf]

# **p21Waf1 deficiency does not decrease DNA repair in E1A+cHa-Ras transformed cells by HDI sodium butyrate**

Maria Igotti, Olga Gnedina, Alisa Morshneva, Svetlana Svetlikova and Valery Pospelov

## **Supplementary material**

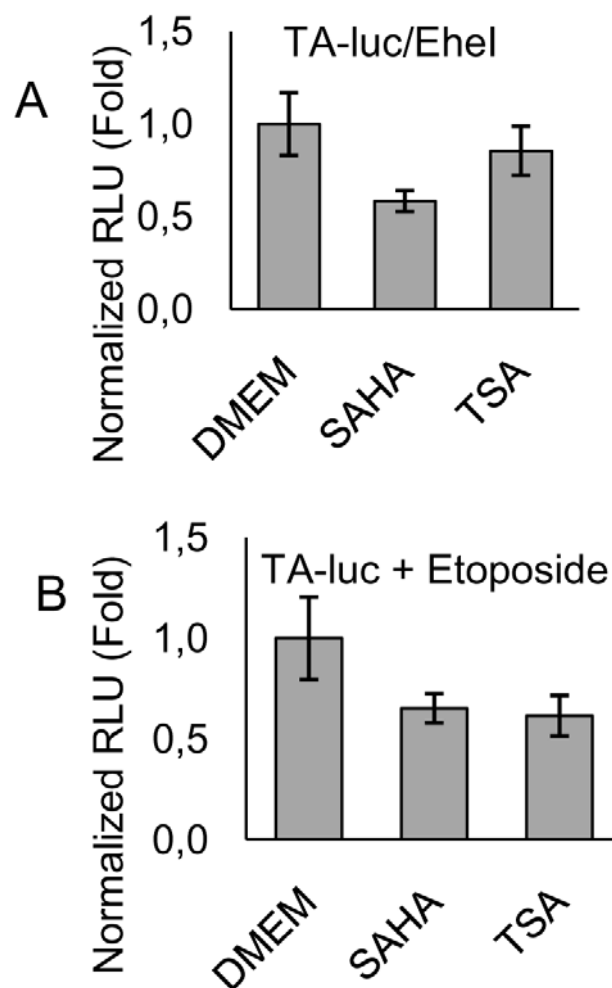

**Supplementary Figure 1** HDAC inhibitors SAHA and TSA repress reparation of damaged exogenous DNA in E1A+Ras transformed cells. (A) Host-cell reactivation of endonuclease-damaged pTA-luc reporter vector in ERas cells after 5 mkM SAHA or 10 mkM TSA treatment for 24 h. (B) Host-cell reactivation of etoposide-damaged reporter vector pTA-luc in ERas cells untreated or treated with 5 mkM SAHA or 10 mkM TSA for 24 h. Relative fold of HCR represents DNA repair activity, calculated as described in section Materials and Methods.

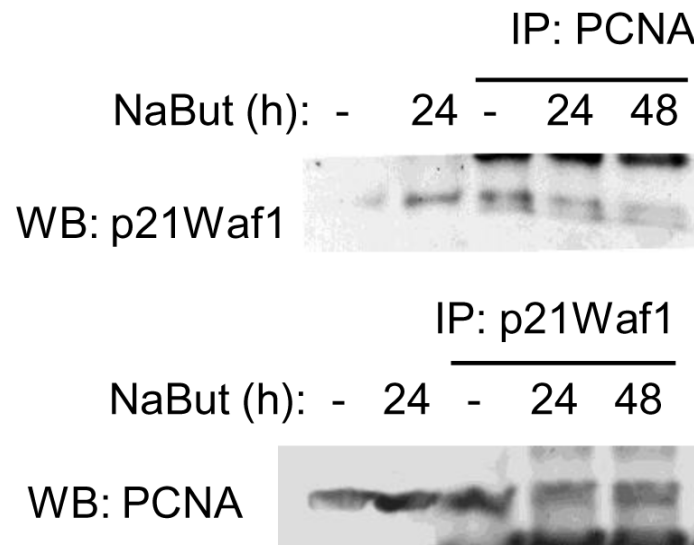

**Supplementary Figure 2** The association of p21Waf1 and PCNA proteins in ERas cells under NaBut treatment. (A) Immunoblotting with anti-p21Waf1 antibody of proteins immunoprecipitated with an anti-PCNA. (B) Immunoblotting with an anti-PCNA antibody of proteins immunoprecipitated with antibody to p21Waf1.
